# Supplementary material for: Modified mesoporous Y zeolite catalyzed nitration of azobenzene using NO2 as the nitro source combined with density functional theory studies
Source: Royal Society of Chemistry journal article supplement (doi:10.1039/d1nj04398f), 2021-01-01
Supplement: d1nj04398f1.pdf [file d1nj04398f1.pdf]

## Supporting Information

*New Journal of Chemistry*

### **Modified Mesoporous Y Zeolite Catalyzed Nitration of Azobenzene Using NO<sub>2</sub> as Nitro Source Combined with Density Functional Theory Study**

Jiaming Guo, Chuanzhou Guo, Lei Chen and Xinhua Peng\*

*School of Chemistry and Chemical Engineering, Nanjing University of Science and*

*Technology, Nanjing 210094, China.*

*\*Corresponding author: xhpeng@njjust.edu.cn*

#### **Table of Contents**

**Table S1** The yield of azoxybenzene under mesoporous Y zeolites with different metal modifications.

**Table S2** The yield of azoxybenzene under different temperature.

**Fig. S1** Maximum and minimum points of the electrostatic potential of azobenzene.

**Fig. S2** Minimum points of the average local ionization energy of azobenzene.

**Fig. S3** Maximum and minimum values of the electrostatic potential of azobenzene.

**Fig. S4** Minimum values of the average local ionization energy of azobenzene.

**<sup>1</sup>H NMR data for products.**

**<sup>1</sup>H NMR Spectra**

**Table S1** The yield of azoxybenzene under mesoporous Y zeolites with different metal modifications <sup>a</sup>

| Entry | Catalyst | Time (h) | Solvent | Conversion (%) | Yield (%) <sup>b</sup> |
|-------|----------|----------|---------|----------------|------------------------|
| 1     | Cu-Y     | 10       | DCE     | 83.6           | 14.6                   |
| 2     | La-Y     | 10       | DCE     | 83.9           | 30.7                   |
| 3     | Ce-Y     | 10       | DCE     | 82.3           | 33.5                   |
| 4     | Co-Y     | 10       | DCE     | 83.0           | 35.2                   |

<sup>a</sup> Reaction conditions: azobenzene (0.55mmol), NO<sub>2</sub> (6.3mmol), catalyst (0.10 g), DCE (5 mL), 10 °C, O<sub>2</sub> balloon.

<sup>b</sup> HPLC yield using naphthalene as an internal standard. Yield of azoxybenzene.

**Table S2** The yield of azoxybenzene under different temperature <sup>a</sup>

| Entry | Catalyst | Temperature (°C) | Solvent | Conversion (%) | Yield (%) <sup>b</sup> |
|-------|----------|------------------|---------|----------------|------------------------|
| 1     | Fe-Y     | 25               | DCE     | 94.7           | 13.3                   |
| 2     | Fe-Y     | 40               | DCE     | 94.7           | 22.6                   |
| 3     | Fe-Y     | 60               | DCE     | 93.9           | 39.3                   |

<sup>a</sup> Reaction conditions: azobenzene (0.55mmol), NO<sub>2</sub> (6.3mmol), catalyst (0.10 g), DCE (5 mL), 20 h, O<sub>2</sub> balloon.

<sup>b</sup> HPLC yield using naphthalene as an internal standard. Yield of azoxybenzene.

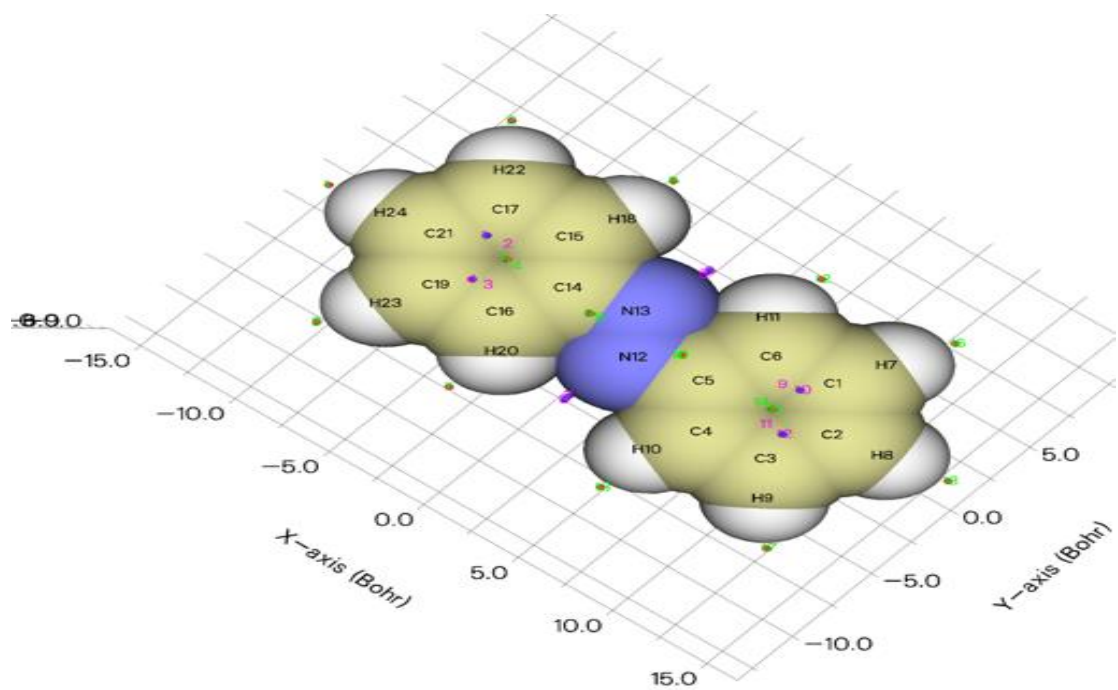

Fig. S1 Maximum and minimum points of the electrostatic potential of azobenzene.

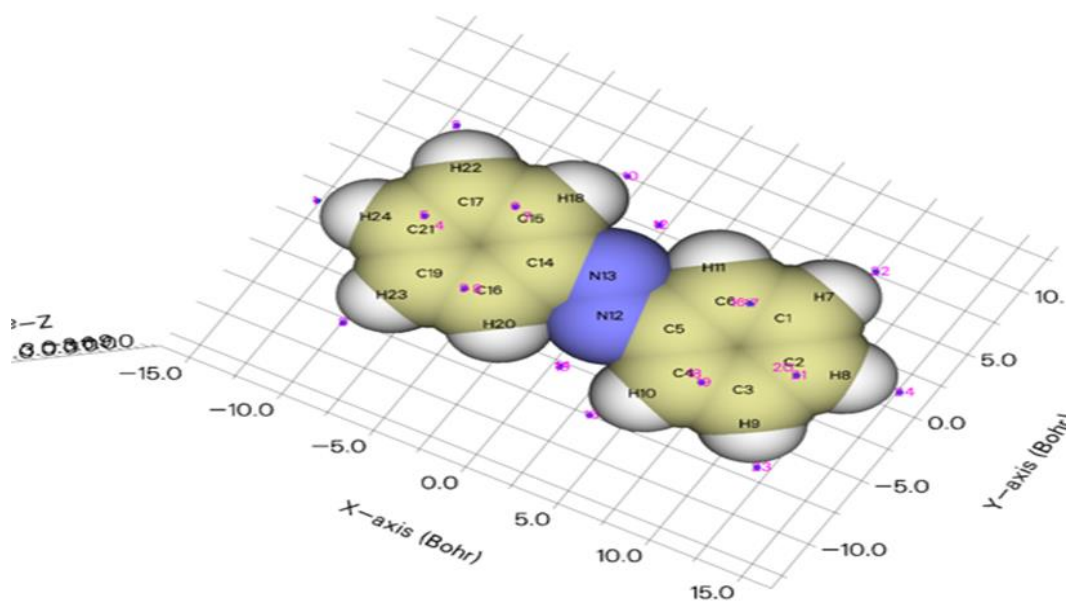

Fig. S2 Minimum points of the average local ionization energy of azobenzene.

| Number of surface minima: 12 |             |           |            |                             |           |           |
|------------------------------|-------------|-----------|------------|-----------------------------|-----------|-----------|
| #                            | a. u.       | eV        | kcal/mol   | X/Y/Z coordinate (Angstrom) |           |           |
| 1                            | -0.02035535 | -0.553897 | -12.773184 | -3.652961                   | 0.284244  | 1.878342  |
| 2                            | -0.02036085 | -0.554047 | -12.776637 | -3.583460                   | 0.402204  | -1.883447 |
| 3                            | -0.02063802 | -0.561589 | -12.950565 | -3.120397                   | -0.750052 | -1.923414 |
| 4                            | -0.02063822 | -0.561594 | -12.950689 | -3.113481                   | -0.748795 | 1.923225  |
| * 5                          | -0.03234850 | -0.880247 | -20.299008 | -0.116845                   | 2.115044  | -1.014053 |
| 6                            | -0.03229967 | -0.878919 | -20.268367 | -0.092511                   | 2.139224  | 0.979428  |
| 7                            | -0.03234516 | -0.880157 | -20.296913 | 0.129245                    | -2.155688 | -0.960491 |
| 8                            | -0.03234089 | -0.880040 | -20.294229 | 0.124996                    | -2.164975 | 0.946534  |
| 9                            | -0.02064404 | -0.561753 | -12.954344 | 3.104874                    | 0.706554  | -1.912705 |
| 10                           | -0.02064269 | -0.561716 | -12.953498 | 3.096699                    | 0.704880  | 1.912266  |
| 11                           | -0.02035571 | -0.553907 | -12.773415 | 3.569179                    | -0.395119 | -1.878801 |
| 12                           | -0.02036047 | -0.554037 | -12.776400 | 3.598792                    | -0.370862 | 1.880521  |

  

| Number of surface maxima: 18 |             |           |            |                             |           |           |
|------------------------------|-------------|-----------|------------|-----------------------------|-----------|-----------|
| #                            | a. u.       | eV        | kcal/mol   | X/Y/Z coordinate (Angstrom) |           |           |
| 1                            | 0.02337580  | 0.636088  | 14.668550  | -6.962779                   | -0.495088 | 0.036070  |
| 2                            | 0.02256947  | 0.614147  | 14.162571  | -5.532416                   | 3.011621  | -0.003101 |
| 3                            | 0.02171327  | 0.590848  | 13.625295  | -4.714400                   | -3.512923 | 0.045959  |
| 4                            | -0.01855391 | -0.504878 | -11.642766 | -3.036902                   | 0.008247  | -1.729711 |
| 5                            | -0.01855765 | -0.504979 | -11.645110 | -3.001625                   | 0.023719  | 1.735810  |
| 6                            | 0.01716212  | 0.467005  | 10.769402  | -2.183124                   | 3.644185  | 0.055204  |
| 7                            | 0.01349679  | 0.367266  | 8.469372   | -1.716245                   | -3.324268 | 0.012228  |
| 8                            | -0.01176536 | -0.320152 | -7.382880  | -0.871179                   | -0.092467 | -1.790660 |
| 9                            | -0.01174040 | -0.319473 | -7.367220  | -0.978647                   | -0.116368 | 1.796063  |
| 10                           | -0.01176052 | -0.320020 | -7.379841  | 0.966582                    | 0.030773  | -1.809038 |
| 11                           | -0.01172766 | -0.319126 | -7.359223  | 0.950005                    | 0.075604  | 1.799977  |
| 12                           | 0.01350004  | 0.367355  | 8.471408   | 1.611540                    | 3.323282  | 0.020474  |
| 13                           | 0.01715696  | 0.466865  | 10.766163  | 2.173371                    | -3.644215 | 0.048283  |
| 14                           | -0.01856534 | -0.505189 | -11.649936 | 3.047867                    | 0.008786  | -1.728230 |
| 15                           | -0.01857078 | -0.505337 | -11.653348 | 3.058651                    | 0.012512  | 1.726873  |
| 16                           | 0.02170245  | 0.590554  | 13.618504  | 4.635113                    | 3.552093  | 0.011099  |
| 17                           | 0.02256510  | 0.614028  | 14.159828  | 5.580306                    | -2.970264 | 0.049430  |
| * 18                         | 0.02338207  | 0.636259  | 14.672484  | 6.950691                    | 0.579330  | 0.049602  |

Fig. S3 Maximum and minimum values of the electrostatic potential of azobenzene.

| Number of surface minima: 24 |            |           |            |                             |           |           |
|------------------------------|------------|-----------|------------|-----------------------------|-----------|-----------|
| #                            | a. u.      | eV        | kcal/mol   | X/Y/Z coordinate (Angstrom) |           |           |
| 1                            | 0.42716932 | 11.623868 | 268.053023 | -6.955383                   | -0.550216 | 0.043381  |
| 2                            | 0.42669727 | 11.611023 | 267.756804 | -5.532416                   | 3.010535  | 0.049830  |
| 3                            | 0.42454013 | 11.552324 | 266.403178 | -4.561690                   | -3.582313 | -0.016164 |
| 4                            | 0.34104363 | 9.280269  | 214.008291 | -4.494992                   | 0.086509  | -1.971857 |
| 5                            | 0.34104174 | 9.280218  | 214.007100 | -4.479441                   | 0.199120  | 1.970079  |
| 6                            | 0.33970494 | 9.243841  | 213.168245 | -2.999217                   | 1.362791  | 1.967555  |
| 7                            | 0.33968442 | 9.243283  | 213.155373 | -2.905872                   | 1.357021  | -1.968583 |
| 8                            | 0.33721221 | 9.176011  | 211.604032 | -2.695423                   | -1.288175 | -1.970042 |
| 9                            | 0.33719933 | 9.175660  | 211.595948 | -2.679900                   | -1.282742 | 1.970271  |
| 10                           | 0.41827347 | 11.381800 | 262.470784 | -1.542773                   | 3.470776  | -0.035498 |
| 11                           | 0.32345133 | 8.801558  | 202.968943 | -0.191489                   | 2.472837  | -0.112766 |
| 12                           | 0.32346918 | 8.802044  | 202.980145 | -0.188887                   | 2.475439  | 0.073392  |
| * 13                         | 0.32341947 | 8.800691  | 202.948955 | 0.187982                    | -2.447614 | 0.297996  |
| 14                           | 0.32342658 | 8.800885  | 202.953413 | 0.190946                    | -2.438502 | -0.340966 |
| 15                           | 0.41827118 | 11.381738 | 262.469349 | 1.505500                    | -3.450326 | 0.020333  |
| 16                           | 0.33722352 | 9.176319  | 211.611131 | 2.596146                    | 1.250604  | -1.971102 |
| 17                           | 0.33720563 | 9.175832  | 211.599908 | 2.612203                    | 1.257738  | 1.970980  |
| 18                           | 0.33967018 | 9.242896  | 213.146438 | 2.911830                    | -1.289172 | -1.973477 |
| 19                           | 0.33970454 | 9.243831  | 213.167995 | 2.931579                    | -1.281749 | 1.973864  |
| 20                           | 0.34104451 | 9.280293  | 214.008839 | 4.500656                    | -0.124378 | -1.970525 |
| 21                           | 0.34107358 | 9.281084  | 214.027082 | 4.516546                    | -0.118673 | 1.969490  |
| 22                           | 0.42454177 | 11.552369 | 266.404204 | 4.613405                    | 3.561056  | -0.039630 |
| 23                           | 0.42670056 | 11.611113 | 267.758866 | 5.465489                    | -3.061759 | -0.025150 |
| 24                           | 0.42716033 | 11.623624 | 268.047376 | 6.959577                    | 0.523883  | -0.028486 |

Fig. S4 Minimum values of the average local ionization energy of azobenzene.

## <sup>1</sup>H NMR data for products

### (E)-1-(2-nitrophenyl)-2-phenyldiazene

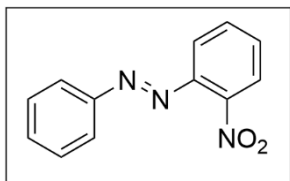

Orange solid, m. p. 66-68 °C (lit.<sup>1</sup> 67-68 °C) <sup>1</sup>H NMR (500 MHz, DMSO-*d*<sub>6</sub>): δ 8.28 – 8.22 (m, 2H), 8.20 (dd, *J* = 8.2, 1.3 Hz, 1H), 7.91 (td, *J* = 7.8, 1.4 Hz, 1H), 7.80 – 7.73 (m, 1H), 7.66 (dddd, *J* = 11.3, 9.1, 7.2, 1.6 Hz, 4H).

### (E)-1-(3-nitrophenyl)-2-phenyldiazene

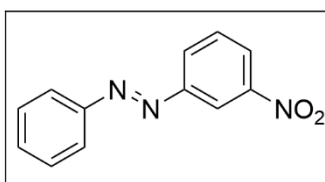

Yellow solid, m. p. 94-95 °C (lit.<sup>2</sup> 95-96 °C) <sup>1</sup>H NMR (500 MHz, Chloroform-*d*): δ 8.75 (t, *J* = 2.1 Hz, 1H), 8.34 (ddd, *J* = 8.2, 2.3, 1.1 Hz, 1H), 8.27 (ddd, *J* = 8.0, 1.9, 1.1 Hz, 1H), 8.03 – 7.93 (m, 2H), 7.72 (t, *J* = 8.0 Hz, 1H), 7.61 – 7.51 (m, 3H).

### (E)-1-(4-nitrophenyl)-2-phenyldiazene

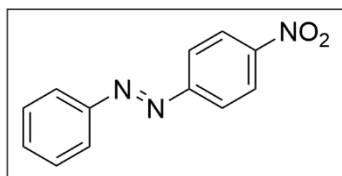

Orange solid, m. p. 130-131 °C (lit.<sup>2</sup> 132-133 °C) <sup>1</sup>H NMR (500 MHz, DMSO-*d*<sub>6</sub>): δ 8.37 (d, *J* = 9.0 Hz, 2H), 8.28 (d, *J* = 8.0 Hz, 2H), 8.13 (d, *J* = 9.0 Hz, 2H), 7.74 (t, *J* = 7.3 Hz, 1H), 7.65 (t, *J* = 7.8 Hz, 2H).

### Azoxybenzene

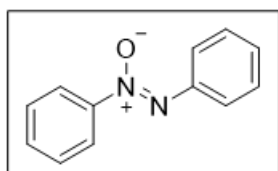

Yellow solid, m. p. 35-36 °C (lit.<sup>3</sup> 36-37 °C) <sup>1</sup>H NMR (500 MHz, Chloroform-*d*): δ 8.32 (dd, *J* = 7.8, 2.0 Hz, 2H), 8.25 – 8.10 (m, 2H), 7.63 – 7.45 (m, 5H), 7.41 (dd, *J* = 8.3, 6.5 Hz, 1H).

# <sup>1</sup>H NMR Spectra

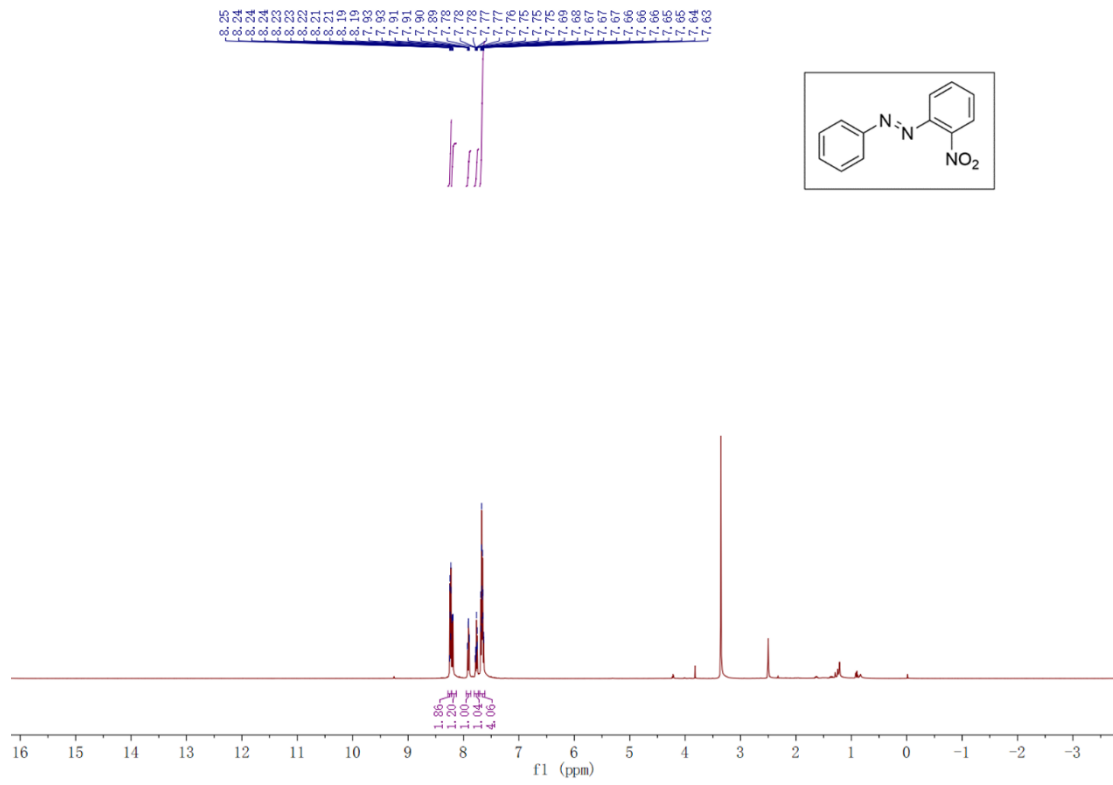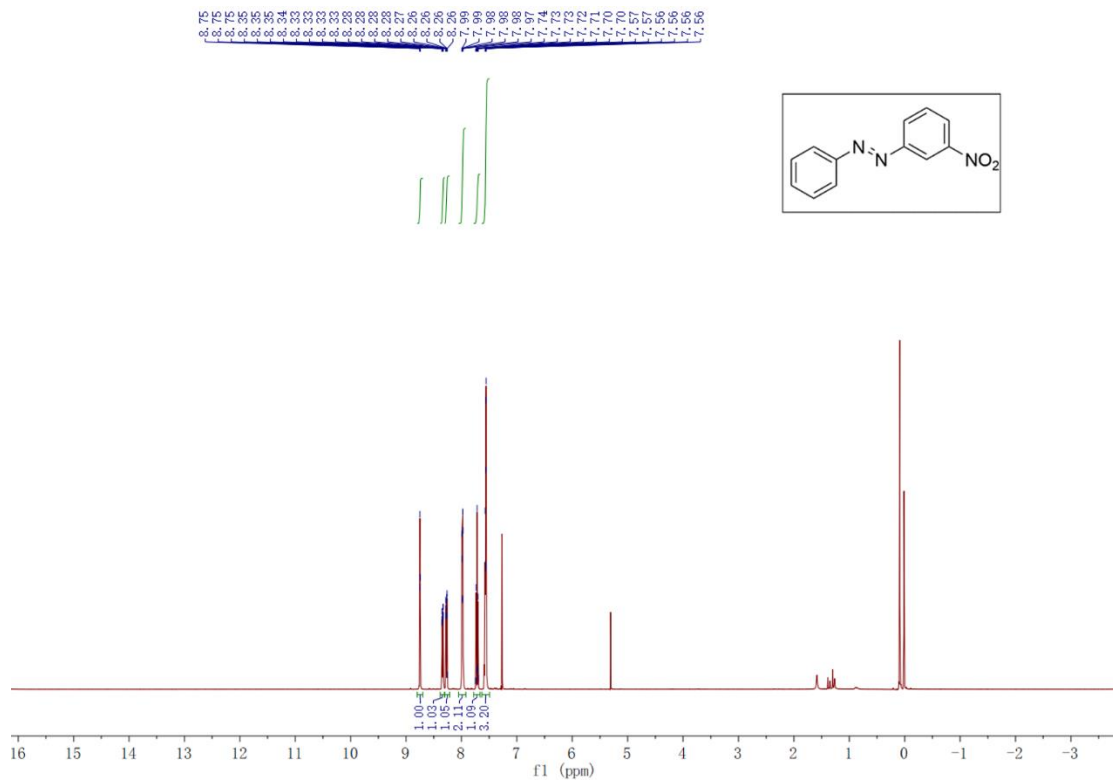

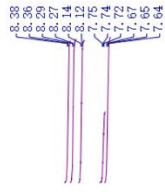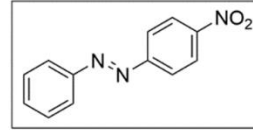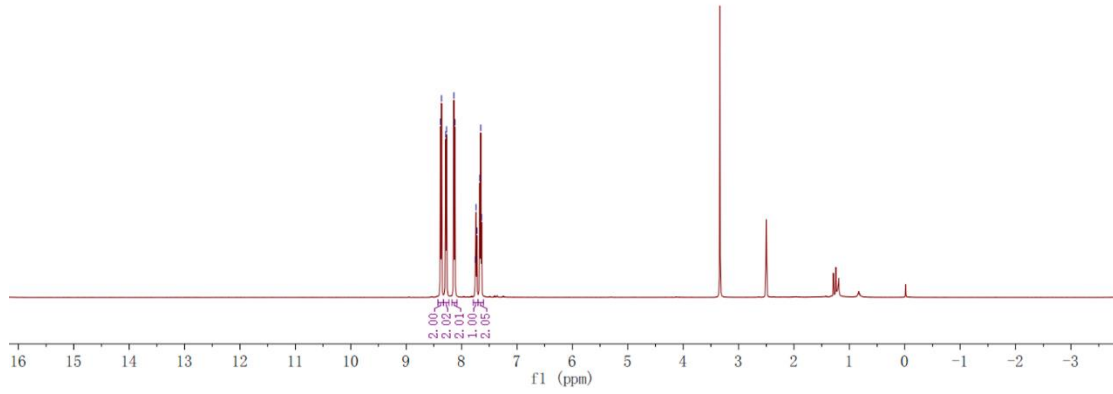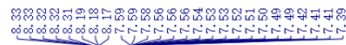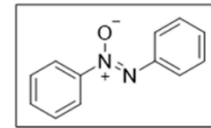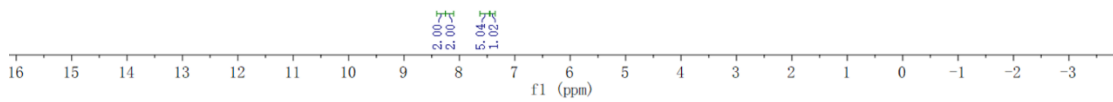

## References

1. J. Dong, B. Jin and P. Sun, *Org. Lett.*, 2014, **16**, 4540-4542.
2. M. Barbero, S. Cadamuro, S. Dughera and C. Giaveno, *Eur. J. Org. Chem.*, 2006, **2006**, 4884-4890.
3. J. H. Boyer and S. E. Ellzey, *J. Am. Chem. Soc.*, 1960, **82**, 2525-2528.
